# Supplementary material for: Investigation on the influence of the skin tone on hyperspectral imaging for free flap surgery
Source: PubMed Central journal article supplement (PMC11183063; doi:10.1038/s41598-024-64549-9), 2024-06-17
Supplement: 41598_2024_64549_MOESM1_ESM.pdf [file 41598_2024_64549_MOESM1_ESM.pdf]

# Investigation on the influence of the skin tone on Hyperspectral Imaging for free flap surgery

Pachyn, Ester\*; Aumiller, Maximilian; Freymüller, Christian; Linek, Matthäus; Volgger, Veronika; Buchner, Alexander; Rühm, Adrian, Sroka, Ronald

## Supplement 1:

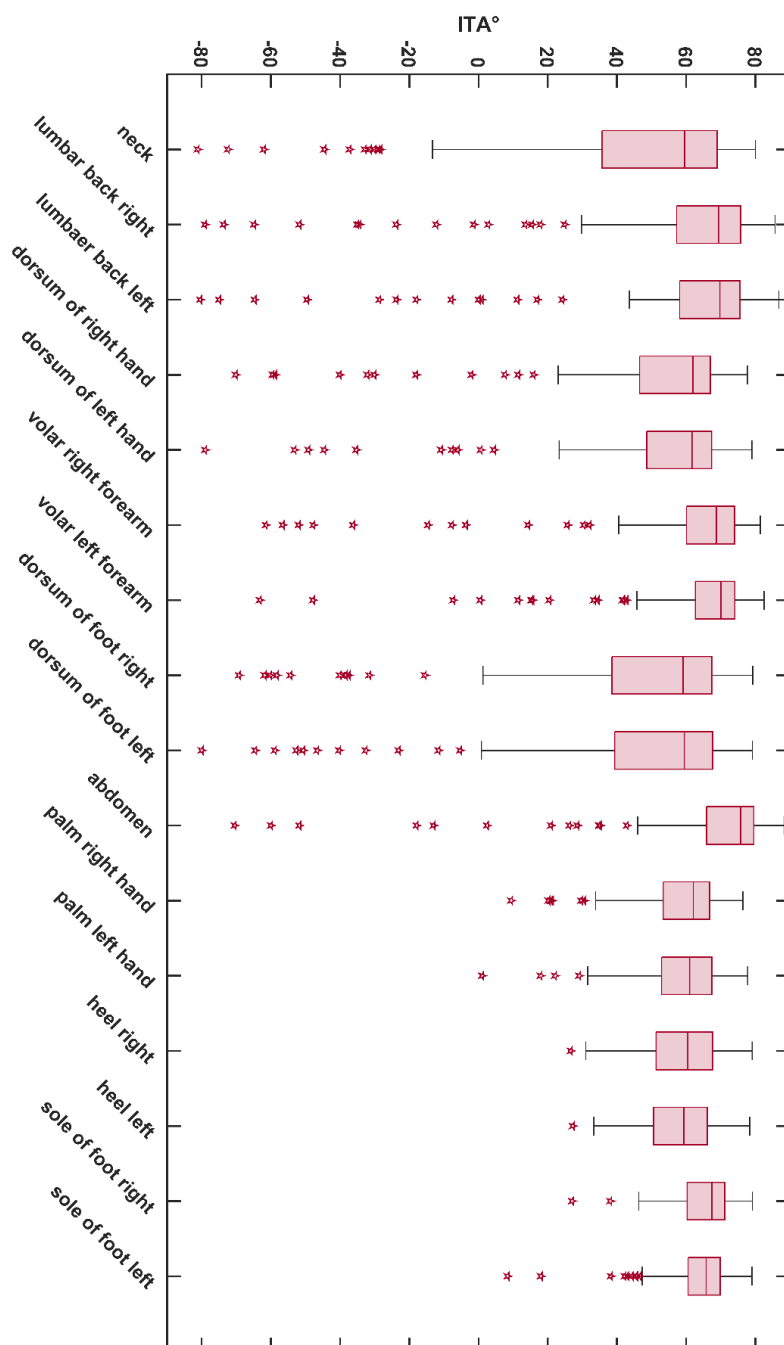

Figure S1: ITA distribution for the individual body sites examined.
