# Supplementary material for: Investigation on the influence of the skin tone on hyperspectral imaging for free flap surgery
Source: PubMed Central journal article supplement (PMC11183063; doi:10.1038/s41598-024-64549-9), 2024-06-17
Supplement: 41598_2024_64549_MOESM2_ESM.pdf [file 41598_2024_64549_MOESM2_ESM.pdf]

# Investigation on the influence of the skin tone on Hyperspectral Imaging for free flap surgery

Pachyn, Ester\*; Aumiller, Maximilian; Freymüller, Christian; Linek, Matthäus; Volgger, Veronika;  
Buchner, Alexander; Rühm, Adrian, Sroka, Ronald

## Supplement 2:

p- value results for correlation test between F-Class and ITA at different body sites.

|              | neck    | lumbar back<br>right | lumbar back left | dorsum right<br>hand |
|--------------|---------|----------------------|------------------|----------------------|
| V/VI vs. IV  | 0.010   | 0.006                | 0.038            | < 0.001              |
| V/VI vs. III | < 0.001 | < 0.001              | < 0.001          | < 0.001              |
| V/VI vs. II  | < 0.001 | < 0.001              | < 0.001          | < 0.001              |
| V/VI vs. I   | < 0.001 | < 0.001              | < 0.001          | < 0.001              |
| IV vs. III   | 0.478   | 1                    | 0.760            | 1                    |
| IV vs. II    | 0.473   | 0.006                | 0.006            | 1                    |
| IV vs. I     | 0.013   | 0.015                | 0.001            | 0.059                |
| III vs. II   | 1       | 0.436                | 1                | 1                    |
| III vs. I    | 0.659   | 0.284                | 0.056            | 0.437                |
| II vs. I     | 0.664   | 1                    | 1                | 0.508                |

|              | dorsum left hand | volar right<br>forearm | volar left<br>forearm | dorsum of foot<br>right |
|--------------|------------------|------------------------|-----------------------|-------------------------|
| V/VI vs. IV  | 0.001            | 0.007                  | 0.003                 | 0.047                   |
| V/VI vs. III | < 0.001          | < 0.001                | < 0.001               | < 0.001                 |
| V/VI vs. II  | < 0.001          | < 0.001                | < 0.001               | < 0.001                 |
| V/VI vs. I   | < 0.001          | < 0.001                | < 0.001               | < 0.001                 |
| IV vs. III   | 00.53            | 0.543                  | 0.414                 | 0.163                   |
| IV vs. II    | 1                | 0.244                  | 0.610                 | 0.077                   |
| IV vs. I     | 0.029            | 0.018                  | 0.007                 | 0.009                   |
| III vs. II   | 1                | 1                      | 1                     | 1                       |
| III vs. I    | 0.368            | 0.738                  | 0.495                 | 0.973                   |
| II vs. I     | 1                | 1                      | 0.376                 | 1                       |

|              | dorsum of foot<br>left | abdomen | palm right hand | palm left hand |
|--------------|------------------------|---------|-----------------|----------------|
| V/VI vs. IV  | 0.173                  | 0.036   | 0.019           | 0.049          |
| V/VI vs. III | < 0.001                | < 0.001 | < 0.001         | < 0.001        |
| V/VI vs. II  | < 0.001                | < 0.001 | < 0.001         | < 0.001        |
| V/VI vs. I   | < 0.001                | < 0.001 | < 0.001         | < 0.001        |
| IV vs. III   | 0.044                  | 0.565   | 1               | 0.224          |
| IV vs. II    | 0.004                  | < 0.001 | 1               | 0.823          |
| IV vs. I     | 0.014                  | 0.002   | 0.317           | 0.041          |
| III vs. II   | 1                      | 0.185   | 1               | 1              |
| III vs. I    | 1                      | 0.140   | 1               | 1              |
| II vs. I     | 1                      | 1       | 1               | 0.965          |

|              | <b>heel right</b> | <b>heel left</b> | <b>sole of right foot</b> | <b>sole of left foot</b> |
|--------------|-------------------|------------------|---------------------------|--------------------------|
| V/VI vs. IV  | 1                 | 1                | 1                         | 1                        |
| V/VI vs. III | 1                 | 1                | 0.021                     | 0.003                    |
| V/VI vs. II  | 0.056             | 0.950            | 0.004                     | < 0.001                  |
| V/VI vs. I   | 0.520             | 1                | 0.672                     | 0.208                    |
| IV vs. III   | 0.984             | 0.893            | 00.044                    | 0.117                    |
| IV vs. II    | 0.017             | 0.115            | 0.008                     | 0.018                    |
| IV vs. I     | 0.418             | 1                | 1                         | 1                        |
| III vs. II   | 1                 | 1                | 1                         | 1                        |
| III vs. I    | 0.015             | 0.213            | 1                         | 1                        |
| II vs. I     | < 0.001           | 0.041            | 1                         | 1                        |
