# Supplementary material for: Investigation on the influence of the skin tone on hyperspectral imaging for free flap surgery
Source: PubMed Central journal article supplement (PMC11183063; doi:10.1038/s41598-024-64549-9), 2024-06-17
Supplement: 41598_2024_64549_MOESM3_ESM.pdf [file 41598_2024_64549_MOESM3_ESM.pdf]

# Investigation on the influence of the skin tone on Hyperspectral Imaging for free flap surgery

Pachyn, Ester\*; Aumiller, Maximilian; Freymüller, Christian; Linek, Matthäus; Volgger, Veronika;  
Buchner, Alexander; Rühm, Adrian, Sroka, Ronald

## Supplement 3:

Significant differences of the tissue indices between the F-Classes at different body sites

| body site                    | tissue indices | F-Classes | p-value  |
|------------------------------|----------------|-----------|----------|
| neck (n=101)                 | NIR-index      | V vs. IV  | 0.025    |
|                              |                | V vs. III | < 0.001  |
|                              |                | V vs. II  | < 0.001  |
|                              |                | V vs. I   | < 0.001  |
|                              |                | VI vs. II | 0.008    |
|                              |                | VI vs. I  | <0.001   |
|                              |                | StO2      | V vs. IV |
|                              | V vs. III      |           | < 0.001  |
|                              | V vs. II       |           | < 0.001  |
|                              | V vs. I        |           | < 0.001  |
|                              | IV vs. III     |           | 0.043    |
|                              | IV vs. II      |           | 0.033    |
|                              | IV vs. I       |           | 0.048    |
|                              | THI            | V vs. IV  | 0.004    |
|                              |                | V vs. III | < 0.001  |
|                              |                | V vs. II  | < 0.001  |
|                              |                | V vs. I   | <0.001   |
|                              |                | IV vs. I  | 0.005    |
|                              | TWI            | V vs. IV  | 0.014    |
|                              |                | V vs. III | < 0.001  |
|                              |                | V vs. II  | < 0.001  |
| V vs. I                      |                | < 0.001   |          |
| IV vs. II                    |                | 0.024     |          |
| lumbar back right<br>(n=100) | NIR-index      | V vs. III | < 0.001  |
|                              |                | V vs. II  | < 0.001  |
|                              |                | V vs. I   | < 0.001  |
|                              |                | IV vs. II | < 0.001  |
|                              |                | IV vs. I  | < 0.001  |
|                              |                | III vs. I | 0.013    |
|                              |                | StO2      | V vs. IV |
|                              | V vs. III      |           | < 0.001  |
|                              | V vs. II       |           | < 0.001  |
|                              | V vs. I        |           | < 0.001  |
|                              | IV vs. II      |           | 0.001    |
|                              | THI            | IV vs. I  | 0.019    |
|                              |                | V vs. IV  | 0.039    |
|                              |                | V vs. III | < 0.001  |
|                              |                | V vs. II  | < 0.001  |
|                              |                | V vs. I   | < 0.001  |
|                              | IV vs. II      | < 0.001   |          |

|                                 |           |            |         |
|---------------------------------|-----------|------------|---------|
|                                 |           | IV vs. I   | 0.001   |
|                                 | TWI       | V vs. IV   | 0.003   |
|                                 |           | V vs. III  | < 0.001 |
|                                 |           | V vs. II   | < 0.001 |
|                                 |           | V vs. I    | < 0.001 |
| lumbar back left<br>(n=100)     | NIR-index | V vs. III  | < 0.001 |
|                                 |           | V vs. II   | < 0.001 |
|                                 |           | V vs. I    | < 0.001 |
|                                 |           | IV vs. III | 0.024   |
|                                 |           | IV vs. II  | < 0.001 |
|                                 |           | IV vs. I   | < 0.001 |
|                                 | StO2      | V vs. IV   | 0.022   |
|                                 |           | V vs. III  | < 0.001 |
|                                 |           | V vs. II   | < 0.001 |
|                                 |           | V vs. I    | < 0.001 |
|                                 |           | IV vs. II  | 0.003   |
|                                 |           | IV vs. I   | 0.024   |
|                                 | THI       | V vs. IV   | 0.035   |
|                                 |           | V vs. III  | < 0.001 |
|                                 |           | V vs. II   | < 0.001 |
|                                 |           | V vs. I    | < 0.001 |
|                                 |           | IV vs. II  | 0.001   |
|                                 |           | IV vs. I   | < 0.001 |
|                                 |           | III vs. I  | 0.045   |
|                                 | TWI       | V vs. IV   | 0.012   |
| V vs. III                       |           | < 0.001    |         |
| V vs. II                        |           | < 0.001    |         |
| V vs. I                         |           | 0.003      |         |
| IV vs. III                      |           | 0.018      |         |
| IV vs. II                       |           | 0.047      |         |
| dorsum of hand right<br>(n=101) | NIR-index | V vs. IV   | 0.012   |
|                                 |           | V vs. III  | < 0.001 |
|                                 |           | V vs. II   | < 0.001 |
|                                 |           | V vs. I    | < 0.001 |
|                                 |           | VI vs. II  | 0.012   |
|                                 |           | VI vs. I   | 0.001   |
|                                 | StO2      | V vs. IV   | 0.003   |
|                                 |           | V vs. III  | < 0.001 |
|                                 |           | V vs. II   | < 0.001 |
|                                 |           | V vs. I    | < 0.001 |
|                                 |           | IV vs. II  | 0.05    |
|                                 | THI       | V vs. IV   | 0.001   |
|                                 |           | V vs. III  | < 0.001 |
|                                 |           | V vs. II   | < 0.001 |
|                                 |           | V vs. I    | < 0.001 |
|                                 |           | IV vs. I   | 0.016   |
|                                 | TWI       | V vs. IV   | 0.004   |
|                                 |           | V vs. III  | < 0.001 |
|                                 |           | V vs. II   | < 0.001 |
|                                 |           | V vs. I    | < 0.001 |
| IV vs. I                        |           | 0.029      |         |
| dorsum of hand left<br>(n=101)  | NIR-index | V vs. IV   | 0.014   |
|                                 |           | V vs. III  | < 0.001 |

|                       |           |           |         |
|-----------------------|-----------|-----------|---------|
|                       |           | V vs. II  | < 0.001 |
|                       |           | V vs. I   | < 0.001 |
|                       |           | VI vs. II | 0.003   |
|                       |           | VI vs. I  | 0.001   |
|                       | StO2      | V vs. IV  | 0.003   |
|                       |           | V vs. III | < 0.001 |
|                       |           | V vs. II  | < 0.001 |
|                       |           | V vs. I   | < 0.001 |
|                       |           | IV vs. II | 0.026   |
|                       | THI       | V vs. IV  | 0.001   |
|                       |           | V vs. III | <0.001  |
|                       |           | V vs. II  | < 0.001 |
|                       |           | V vs. I   | < 0.001 |
|                       | TWI       | V vs. IV  | 0.003   |
|                       |           | V vs. III | < 0.001 |
|                       |           | V vs. II  | < 0.001 |
|                       |           | V vs. I   | < 0.001 |
|                       |           | IV vs. I  | 0.018   |
| forearm right (n=101) | NIR-index | V vs. IV  | 0.025   |
|                       |           | V vs. III | < 0.001 |
|                       |           | V vs. II  | < 0.001 |
|                       |           | V vs. I   | < 0.001 |
|                       |           | IV vs. II | 0.002   |
|                       |           | IV vs. I  | 0.036   |
|                       | StO2      | V vs. III | < 0.001 |
|                       |           | V vs. II  | < 0.001 |
|                       |           | V vs. I   | 0.009   |
|                       |           | IV vs. II | 0.022   |
|                       | THI       | V vs. IV  | 0.004   |
|                       |           | V vs. III | < 0.001 |
|                       |           | V vs. II  | < 0.001 |
|                       |           | V vs. I   | < 0.001 |
|                       |           | IV vs. I  | 0.033   |
|                       | TWI       | V vs. III | < 0.001 |
|                       |           | V vs. II  | < 0.001 |
|                       |           | V vs. I   | < 0.001 |
|                       |           | IV vs. I  | 0.006   |
| forearm left (n=101)  | NIR-index | V vs. IV  | 0.006   |
|                       |           | V vs. III | < 0.001 |
|                       |           | V vs. II  | < 0.001 |
|                       |           | V vs. I   | < 0.001 |
|                       |           | IV vs. II | 0.037   |
|                       |           | IV vs. I  | 0.002   |
|                       | StO2      | V vs. IV  | 0.009   |
|                       |           | V vs. III | < 0.001 |
|                       |           | V vs. II  | < 0.001 |
|                       |           | V vs. I   | 0.001   |
|                       | THI       | V vs. IV  | 0.005   |
|                       |           | V vs. III | < 0.001 |
|                       |           | V vs. II  | < 0.001 |
|                       |           | V vs. I   | < 0.001 |
|                       |           | IV vs. I  | 0.001   |
|                       | TWI       | V vs. IV  | 0.013   |

|                                |           |            |         |  |
|--------------------------------|-----------|------------|---------|--|
|                                |           | V vs. III  | < 0.001 |  |
|                                |           | V vs. II   | 0.001   |  |
|                                |           | V vs. I    | < 0.001 |  |
|                                |           | IV vs. I   | 0.028   |  |
| dorsum of foot right<br>(n=99) | NIR-index | V vs. IV   | 0.05    |  |
|                                |           | V vs. III  | < 0.001 |  |
|                                |           | V vs. II   | < 0.001 |  |
|                                |           | V vs. I    | < 0.001 |  |
|                                |           | VI vs. II  | < 0.001 |  |
|                                |           | VI vs. I   | 0.001   |  |
|                                | StO2      | V vs. IV   | 0.001   |  |
|                                |           | V vs. III  | < 0.001 |  |
|                                |           | V vs. II   | < 0.001 |  |
|                                |           | V vs. I    | < 0.001 |  |
|                                | THI       | V vs. III  | < 0.001 |  |
|                                |           | V vs. II   | < 0.001 |  |
|                                |           | V vs. I    | < 0.001 |  |
|                                |           | IV vs. III | 0.025   |  |
|                                |           | IV vs. II  | 0.001   |  |
|                                |           | IV vs. I   | 0.005   |  |
|                                | TWI       | V vs. IV   | 0.001   |  |
|                                |           | V vs. III  | < 0.001 |  |
| V vs. II                       |           | < 0.001    |         |  |
| V vs. I                        |           | < 0.001    |         |  |
| IV vs. I                       |           | 0.043      |         |  |
|                                |           |            |         |  |
| dorsum of foot left<br>(n=100) | NIR-index | V vs. III  | < 0.001 |  |
|                                |           | V vs. II   | < 0.001 |  |
|                                |           | V vs. I    | < 0.001 |  |
|                                |           | VI vs. II  | < 0.001 |  |
|                                |           | VI vs. I   | < 0.001 |  |
|                                |           |            |         |  |
|                                | StO2      | V vs. IV   | 0.02    |  |
|                                |           | V vs. III  | < 0.001 |  |
|                                |           | V vs. II   | < 0.001 |  |
|                                |           | V vs. I    | < 0.001 |  |
|                                | THI       | V vs. IV   | 0.048   |  |
|                                |           | V vs. III  | < 0.001 |  |
|                                |           | V vs. II   | < 0.001 |  |
|                                |           | V vs. I    | < 0.001 |  |
|                                |           | IV vs. II  | 0.002   |  |
|                                |           | IV vs. I   | 0.004   |  |
|                                | TWI       | V vs. IV   | 0.001   |  |
|                                |           | V vs. III  | < 0.001 |  |
| V vs. II                       |           | < 0.001    |         |  |
| V vs. I                        |           | < 0.001    |         |  |
| IV vs. I                       |           | 0.042      |         |  |
|                                |           |            |         |  |
| abdomen (n=101)                | NIR-index | V vs. IV   | 0.027   |  |
|                                |           | V vs. III  | < 0.001 |  |
|                                |           | V vs. II   | < 0.001 |  |
|                                |           | V vs. I    | < 0.001 |  |
|                                |           | VI vs. II  | 0.001   |  |
|                                |           | VI vs. I   | < 0.001 |  |
|                                | StO2      | V vs. IV   | 0.029   |  |
|                                |           | V vs. III  | < 0.001 |  |
|                                |           |            |         |  |

|     |           |         |
|-----|-----------|---------|
|     | V vs. II  | < 0.001 |
|     | V vs. I   | < 0.001 |
| THI | V vs. IV  | 0.041   |
|     | V vs. III | < 0.001 |
|     | V vs. II  | < 0.001 |
|     | V vs. I   | < 0.001 |
|     | IV vs. II | < 0.001 |
|     | IV vs. I  | < 0.001 |
| TWI | V vs. IV  | 0.02    |
|     | V vs. III | < 0.001 |
|     | V vs. II  | < 0.001 |
|     | V vs. I   | < 0.001 |
