# Supplementary material for: Investigation on the influence of the skin tone on hyperspectral imaging for free flap surgery
Source: PubMed Central journal article supplement (PMC11183063; doi:10.1038/s41598-024-64549-9), 2024-06-17
Supplement: 41598_2024_64549_MOESM4_ESM.pdf [file 41598_2024_64549_MOESM4_ESM.pdf]

# Investigation on the influence of the skin tone on Hyperspectral Imaging for free flap surgery

Pachyn, Ester\*; Aumiller, Maximilian; Freymüller, Christian; Linek, Matthäus; Volgger, Veronika;  
Buchner, Alexander; Rühm, Adrian, Sroka, Ronald

## Supplement 4:

Mean and standard deviation of the tissue indices, pigmented body sites

| body site | Class | NIR-index<br>(a.u.) | StO2 (%) | THI (a.u.) | TWI (a.u.) |
|-----------|-------|---------------------|----------|------------|------------|
| neck      | I     | 53 ± 6              | 69 ± 8   | 13 ± 13    | 41 ± 3     |
|           | II    | 44 ± 12             | 66 ± 13  | 31 ± 21    | 41 ± 6     |
|           | III   | 41 ± 10             | 65 ± 12  | 33 ± 17    | 40 ± 5     |
|           | IV    | 28 ± 15             | 53 ± 12  | 41 ± 17    | 36 ± 5     |
|           | V/VI  | 3 ± 8               | 32 ± 10  | 83 ± 19    | 22 ± 11    |

| body site            | Class | NIR-index<br>(a.u.) | StO2 (%) | THI (a.u.) | TWI (a.u.) |
|----------------------|-------|---------------------|----------|------------|------------|
| lumbar back<br>right | I     | 56 ± 4              | 57 ± 11  | 8 ± 8      | 54 ± 4     |
|                      | II    | 49 ± 6              | 54 ± 11  | 12 ± 11    | 54 ± 6     |
|                      | III   | 43 ± 9              | 50 ± 13  | 21 ± 11    | 54 ± 6     |
|                      | IV    | 28 ± 15             | 40 ± 9   | 36 ± 19    | 50 ± 6     |
|                      | V/VI  | 2 ± 6               | 22 ± 10  | 83 ± 17    | 27 ± 15    |

| body site           | F-Class | NIR-index<br>(a.u.) | StO2 (%) | THI (a.u.) | TWI (a.u.) |
|---------------------|---------|---------------------|----------|------------|------------|
| lumbar back<br>left | I       | 54 ± 4              | 58 ± 12  | 5 ± 6      | 52 ± 4     |
|                     | II      | 49 ± 6              | 55 ± 11  | 13 ± 11    | 54 ± 6     |
|                     | III     | 44 ± 10             | 50 ± 12  | 20 ± 11    | 55 ± 6     |
|                     | IV      | 28 ± 15             | 42 ± 9   | 34 ± 18    | 48 ± 6     |
|                     | V/VI    | 1 ± 5               | 24 ± 10  | 86 ± 19    | 26 ± 15    |

| body site               | F-Class | NIR-index<br>(a.u.) | StO2 (%) | THI (a.u.) | TWI (a.u.) |
|-------------------------|---------|---------------------|----------|------------|------------|
| dorsum<br>hand<br>right | off     | 52 ± 5              | 60 ± 9   | 16 ± 10    | 44 ± 4     |
|                         | II      | 47 ± 9              | 60 ± 9   | 31 ± 13    | 40 ± 5     |
|                         | III     | 45 ± 7              | 57 ± 9   | 29 ± 11    | 42 ± 6     |
|                         | IV      | 35 ± 12             | 51 ± 10  | 36 ± 15    | 37 ± 5     |
|                         | V/VI    | 4 ± 9               | 33 ± 8   | 78 ± 18    | 25 ± 9     |

| body site              | F-Class | NIR-index<br>(a.u.) | StO2 (%) | THI (a.u.) | TWI (a.u.) |
|------------------------|---------|---------------------|----------|------------|------------|
| dorsum<br>hand<br>left | off     | 54 ± 5              | 61 ± 9   | 19 ± 13    | 44 ± 3     |
|                        | II      | 49 ± 10             | 61 ± 10  | 27 ± 11    | 40 ± 6     |
|                        | III     | 45 ± 9              | 55 ± 8   | 29 ± 13    | 39 ± 6     |
|                        | IV      | 36 ± 11             | 52 ± 9   | 36 ± 14    | 38 ± 4     |
|                        | V/VI    | 5 ± 10              | 34 ± 8   | 77 ± 18    | 25 ± 10    |

| body site     | F-Class | NIR-index (a.u.) | StO2 (%) | THI (a.u.) | TWI (a.u.) |
|---------------|---------|------------------|----------|------------|------------|
| forearm right | I       | 51 ± 6           | 51 ± 10  | 11 ± 12    | 44 ± 3     |
|               | II      | 51 ± 8           | 54 ± 9   | 17 ± 11    | 40 ± 5     |
|               | III     | 48 ± 7           | 52 ± 8   | 18 ± 9     | 40 ± 5     |
|               | IV      | 39 ± 10          | 46 ± 8   | 25 ± 12    | 38 ± 5     |
|               | V/VI    | 7 ± 13           | 36 ± 8   | 67 ± 22    | 28 ± 10    |

| body site    | F-Class | NIR-index (a.u.) | StO2 (%) | THI (a.u.) | TWI (a.u.) |
|--------------|---------|------------------|----------|------------|------------|
| forearm left | I       | 55 ± 5           | 52 ± 10  | 7 ± 6      | 45 ± 3     |
|              | II      | 50 ± 8           | 53 ± 9   | 16 ± 11    | 40 ± 6     |
|              | III     | 48 ± 7           | 50 ± 8   | 18 ± 8     | 41 ± 5     |
|              | IV      | 41 ± 10          | 47 ± 8   | 24 ± 9     | 39 ± 5     |
|              | V/VI    | 8 ± 13           | 36 ± 8   | 66 ± 21    | 30 ± 10    |

| body site  | F-Class | NIR-index (a.u.) | StO2 (%) | THI (a.u.) | TWI (a.u.) |
|------------|---------|------------------|----------|------------|------------|
| dorsum     | ofI     | 47 ± 6.11        | 46 ± 4   | 18 ± 11    | 46 ± 3     |
| foot right | II      | 45 ± 6.20        | 44 ± 6   | 21 ± 9     | 41 ± 6     |
|            | III     | 40 ± 7.02        | 42 ± 6   | 24 ± 8     | 41 ± 6     |
|            | IV      | 28 ± 14          | 39 ± 8   | 38 ± 14    | 40 ± 6     |
|            | V/VI    | 3 ± 8            | 24 ± 6   | 78 ± 18    | 25 ± 10    |

| body site | F-Class | NIR-index (a.u.) | StO2 (%) | THI (a.u.) | TWI (a.u.) |
|-----------|---------|------------------|----------|------------|------------|
| dorsum    | ofI     | 48 ± 7           | 46 ± 4   | 15 ± 13    | 47 ± 4     |
| foot left | II      | 46 ± 7           | 45 ± 8   | 21 ± 9     | 42 ± 6     |
|           | III     | 40 ± 9           | 42 ± 7   | 25 ± 11    | 41 ± 6     |
|           | IV      | 28 ± 11          | 40 ± 8   | 37 ± 13    | 40 ± 6     |
|           | V/VI    | 3 ± 9            | 24 ± 6   | 79 ± 19    | 24 ± 10    |

| body site | F-Class | NIR-index (a.u.) | StO2 (%) | THI (a.u.) | TWI (a.u.) |
|-----------|---------|------------------|----------|------------|------------|
| abdomen   | I       | 54 ± 5           | 48 ± 6   | 3 ± 5      | 49 ± 3     |
|           | II      | 49 ± 7           | 45 ± 8   | 5 ± 5      | 47 ± 5     |
|           | III     | 44 ± 9           | 44 ± 9   | 12 ± 10    | 48 ± 7     |
|           | IV      | 34 ± 13          | 38 ± 9   | 22 ± 16    | 45 ± 5     |
|           | V/VI    | 3 ± 8            | 26 ± 10  | 70 ± 20    | 28 ± 12    |
