# Supplementary material for: Investigation on the influence of the skin tone on hyperspectral imaging for free flap surgery
Source: PubMed Central journal article supplement (PMC11183063; doi:10.1038/s41598-024-64549-9), 2024-06-17
Supplement: 41598_2024_64549_MOESM5_ESM.pdf [file 41598_2024_64549_MOESM5_ESM.pdf]

# Investigation on the influence of the skin tone on Hyperspectral Imaging for free flap surgery

Pachyn, Ester\*; Aumiller, Maximilian; Freymüller, Christian; Linek, Matthäus; Volgger, Veronika;  
Buchner, Alexander; Rühm, Adrian, Sroka, Ronald

## Supplement 5:

Significant differences of the tissue indices between the F-Classes, less pigmented body sites

| body site                        | tissue indices | F-Classes | p-value |
|----------------------------------|----------------|-----------|---------|
| palm right (n=101)               | NIR-index      | V vs. IV  | 0.003   |
|                                  |                | V vs. III | < 0.001 |
|                                  |                | V vs. II  | < 0.001 |
|                                  |                | V vs. I   | 0.006   |
|                                  | THI            | V vs. IV  | 0.021   |
|                                  |                | V vs. III | < 0.001 |
|                                  |                | V vs. II  | < 0.001 |
|                                  |                | V vs. I   | < 0.001 |
| palm left (n=101)                | NIR-index      | V vs. IV  | 0.002   |
|                                  |                | V vs. III | < 0.001 |
|                                  |                | V vs. II  | < 0.001 |
|                                  |                | V vs. I   | < 0.001 |
|                                  |                | IV vs. II | 0.018   |
|                                  | THI            | V vs. IV  | 0.022   |
|                                  |                | V vs. III | < 0.001 |
|                                  |                | V vs. II  | < 0.001 |
|                                  |                | V vs. I   | < 0.001 |
|                                  |                | IV vs. I  | 0.011   |
|                                  | TWI            | V vs. IV  | 0.01    |
|                                  |                | V vs. III | 0.004   |
| V vs. II                         |                | 0.002     |         |
| V vs. I                          |                | 0.019     |         |
| heel right (n=100)               | NIR-index      | V vs. I   | 0.026   |
|                                  | THI            | V vs. III | 0.007   |
|                                  |                | V vs. II  | < 0.001 |
|                                  |                | IV vs. II | 0.017   |
|                                  |                | II vs. I  | 0.011   |
| heel left (n=100)                | THI            | V vs. III | 0.041   |
|                                  |                | V vs. II  | 0.001   |
|                                  |                | IV vs. II | 0.045   |
|                                  |                | II vs. I  | 0.03    |
| sole of the foot right<br>(n=99) | THI            | V vs. III | 0.004   |
|                                  |                | V vs. II  | 0.001   |
|                                  |                | IV vs. II | 0.023   |
| sole of the foot left<br>(n=100) | THI            | V vs. III | 0.004   |
|                                  |                | V vs. II  | < 0.001 |
