# Supplementary material for: Investigation on the influence of the skin tone on hyperspectral imaging for free flap surgery
Source: PubMed Central journal article supplement (PMC11183063; doi:10.1038/s41598-024-64549-9), 2024-06-17
Supplement: 41598_2024_64549_MOESM6_ESM.pdf [file 41598_2024_64549_MOESM6_ESM.pdf]

# Investigation on the influence of the skin tone on Hyperspectral Imaging for free flap surgery

Pachyn, Ester\*; Aumiller, Maximilian; Freymüller, Christian; Linek, Matthäus; Volgger, Veronika;  
Buchner, Alexander; Rühm, Adrian, Sroka, Ronald

## Supplement 6:

Mean and standard deviation of the tissue indices, less pigmented body sites

| body site  | F-Class | NIR-index<br>(a.u.) | StO2 (%) | THI (a.u.) | TWI (a.u.) |
|------------|---------|---------------------|----------|------------|------------|
| heel right | I       | 67 ± 6              | 77 ± 11  | 45 ± 11    | 56 ± 5     |
|            | II      | 61 ± 7              | 68 ± 11  | 27 ± 13    | 55 ± 8     |
|            | III     | 60 ± 8              | 68 ± 14  | 32 ± 12    | 54 ± 8     |
|            | IV      | 62 ± 7              | 74 ± 8   | 41 ± 14    | 54 ± 6     |
|            | V/VI    | 57 ± 9              | 74 ± 7   | 46 ± 13    | 56 ± 6     |

| body site | F-Class | NIR-index<br>(a.u.) | StO2 (%) | THI (a.u.) | TWI (a.u.) |
|-----------|---------|---------------------|----------|------------|------------|
| heel left | I       | 64 ± 6              | 73 ± 13  | 44 ± 10    | 58 ± 6     |
|           | II      | 59 ± 7              | 66 ± 12  | 28 ± 12    | 54 ± 9     |
|           | III     | 60 ± 8              | 67 ± 12  | 33 ± 12    | 54 ± 8     |
|           | IV      | 62 ± 8              | 73 ± 10  | 40 ± 13    | 53 ± 7     |
|           | V/VI    | 57 ± 8              | 73 ± 7   | 45 ± 11    | 55 ± 6     |

| body site  | F-Class | NIR-index<br>(a.u.) | StO2 (%) | THI (a.u.) | TWI (a.u.) |
|------------|---------|---------------------|----------|------------|------------|
| palm right | I       | 55 ± 9              | 61 ± 14  | 30 ± 14    | 51 ± 3     |
|            | II      | 57 ± 7              | 69 ± 9   | 33 ± 12    | 48 ± 6     |
|            | III     | 56 ± 7              | 67 ± 8   | 31 ± 10    | 49 ± 6     |
|            | IV      | 52 ± 6              | 67 ± 8   | 39 ± 9     | 47 ± 6     |
|            | V/VI    | 36 ± 14             | 64 ± 10  | 55 ± 11    | 45 ± 5     |

| body site | F-Class | NIR-index<br>(a.u.) | StO2 (%) | THI (a.u.) | TWI (a.u.) |
|-----------|---------|---------------------|----------|------------|------------|
| palm left | I       | 56 ± 6              | 67 ± 12  | 24 ± 10    | 49 ± 3     |
|           | II      | 58 ± 6              | 70 ± 8   | 31 ± 10    | 49 ± 6     |
|           | III     | 55 ± 7              | 66 ± 8   | 33 ± 10    | 48 ± 5     |
|           | IV      | 52 ± 6              | 68 ± 10  | 40 ± 10    | 48 ± 5     |
|           | V/VI    | 30 ± 12             | 63 ± 11  | 55 ± 11    | 42 ± 6     |

| body site  | F-Class | NIR-index<br>(a.u.) | StO2 (%) | THI (a.u.) | TWI (a.u.) |
|------------|---------|---------------------|----------|------------|------------|
| sole right | I       | 55 ± 8              | 55 ± 13  | 29 ± 11    | 57 ± 4     |
|            | II      | 56 ± 6              | 60 ± 10  | 24 ± 10    | 58 ± 6     |
|            | III     | 56 ± 5              | 61 ± 11  | 25 ± 11    | 58 ± 6     |
|            | IV      | 53 ± 7              | 57 ± 10  | 34 ± 12    | 58 ± 6     |
|            | V/VI    | 52 ± 9              | 59 ± 9   | 39 ± 12    | 59 ± 6     |

| <b>body site</b> | <b>F-Class</b> | <b>NIR-index<br/>(a.u.)</b> | <b>StO2 (%)</b> | <b>THI (a.u.)</b> | <b>TWI (a.u.)</b> |
|------------------|----------------|-----------------------------|-----------------|-------------------|-------------------|
| sole left        | I              | 54 ± 9                      | 56 ± 12         | 27 ± 12           | 55 ± 4            |
|                  | II             | 56 ± 6                      | 60 ± 11         | 25 ± 11           | 58 ± 6            |
|                  | III            | 55 ± 5                      | 61 ± 10         | 26 ± 11           | 57 ± 7            |
|                  | IV             | 51 ± 9                      | 59 ± 11         | 32 ± 13           | 55 ± 6            |
|                  | V/VI           | 53 ± 9                      | 63 ± 9          | 39 ± 8            | 57 ± 5            |
