# Supplementary material for: Investigation on the influence of the skin tone on hyperspectral imaging for free flap surgery
Source: PubMed Central journal article supplement (PMC11183063; doi:10.1038/s41598-024-64549-9), 2024-06-17
Supplement: 41598_2024_64549_MOESM7_ESM.pdf [file 41598_2024_64549_MOESM7_ESM.pdf]

# Investigation on the influence of the skin tone on Hyperspectral Imaging for free flap surgery

Pachyn, Ester\*; Aumiller, Maximilian; Freymüller, Christian; Linek, Matthäus; Volgger, Veronika;  
Buchner, Alexander; Rühm, Adrian, Sroka, Ronald

## Supplement 7:

Correlation between the tissue indices and the ITA at different body sites

| <b>body site</b>     | <b>tissue indices</b> | <b>r-value</b> | <b>p-value</b> |
|----------------------|-----------------------|----------------|----------------|
| neck                 | NIR-index             | 0.644          | <0.001         |
|                      | StO2                  | 0.319          | <0.001         |
|                      | THI                   | -0.9           | <0.001         |
|                      | TWI                   | 0.506          | <0.001         |
| lumbar back right    | NIR-index             | 0.746          | <0.001         |
|                      | StO2                  | 0.431          | <0.001         |
|                      | THI                   | -0.928         | <0.001         |
|                      | TWI                   | 0.416          | <0.001         |
| lumbar back left     | NIR-index             | 0.76           | <0.001         |
|                      | StO2                  | 0.435          | <0.001         |
|                      | THI                   | -0.929         | <0.001         |
|                      | TWI                   | 0.456          | <0.001         |
| dorsum of hand right | NIR-index             | 0.692          | <0.001         |
|                      | StO2                  | 0.416          | <0.001         |
|                      | THI                   | -0.875         | <0.001         |
|                      | TWI                   | 0.482          | <0.001         |
| dorsum of hand left  | NIR-index             | 0.702          | <0.001         |
|                      | StO2                  | 0.484          | <0.001         |
|                      | THI                   | -0.851         | <0.001         |
|                      | TWI                   | 0.469          | <0.001         |
| forearm right        | NIR-index             | 0.694          | <0.001         |
|                      | StO2                  | 0.345          | <0.001         |
|                      | THI                   | -0.878         | <0.001         |
|                      | TWI                   | 0.469          | <0.001         |
| forearm left         | NIR-index             | 0.626          | <0.001         |
|                      | StO2                  | 0.283          | <0.001         |
|                      | THI                   | -0.839         | <0.001         |
|                      | TWI                   | 0.525          | <0.001         |
| dorsum of foot right | NIR-index             | 0.660          | <0.001         |
|                      | StO2                  | 0.538          | <0.001         |
|                      | THI                   | -0.806         | <0.001         |
|                      | TWI                   | 0.448          | <0.001         |
| dorsum of foot left  | NIR-index             | 0.698          | <0.001         |
|                      | StO2                  | 0.399          | <0.001         |
|                      | THI                   | -0.851         | <0.001         |
|                      | TWI                   | 0.518          | <0.001         |
| abdomen              | NIR-index             | 0.814          | <0.001         |
|                      | StO2                  | 0.488          | <0.001         |
|                      | THI                   | -0.93          | <0.001         |
|                      | TWI                   | 0.537          | <0.001         |

|            |           |        |        |
|------------|-----------|--------|--------|
| heel right | NIR-index | -0.387 | <0.001 |
|            | StO2      | -0.611 | <0.001 |
|            | THI       | -0.886 | <0.001 |
|            | TWI       | -0.161 | 0.11   |
| heel left  | NIR-index | -0.347 | <0.001 |
|            | StO2      | -0.416 | <0.001 |
|            | THI       | -0.818 | <0.001 |
|            | TWI       | -0.135 | 0.181  |
| palm right | NIR-index | 0.358  | <0.001 |
|            | StO2      | -0.22  | 0.828  |
|            | THI       | -0.801 | <0.001 |
|            | TWI       | 0.171  | 0.087  |
| palm left  | NIR-index | 0.364  | <0.001 |
|            | StO2      | 0.099  | 0.324  |
|            | THI       | -0.838 | <0.001 |
|            | TWI       | 0.174  | 0.082  |
| sole right | NIR-index | -0.126 | 0.213  |
|            | StO2      | -0.344 | <0.001 |
|            | THI       | -0.83  | <0.001 |
|            | TWI       | 0.154  | 0.129  |
| sole left  | NIR-index | 0.034  | 0.734  |
|            | StO2      | -0.189 | 0.059  |
|            | THI       | -0.866 | <0.001 |
|            | TWI       | 0.158  | 0.117  |
