# Supplementary material for: Investigation on the influence of the skin tone on hyperspectral imaging for free flap surgery
Source: PubMed Central journal article supplement (PMC11183063; doi:10.1038/s41598-024-64549-9), 2024-06-17
Supplement: 41598_2024_64549_MOESM8_ESM.pdf [file 41598_2024_64549_MOESM8_ESM.pdf]

# Investigation on the influence of the skin tone on Hyperspectral Imaging for free flap surgery

Pachyn, Ester\*; Aumiller, Maximilian; Freymüller, Christian; Linek, Matthäus; Volgger, Veronika; Buchner, Alexander; Rühm, Adrian, Sroka, Ronald

## Supplement 8:

MatLab Program for conversion of RGB values to LAB and calculation of ITA.

```
%% Extraction of RGB values
```

```
R = mean(squeeze(double(ROI_RGB(:,:,1))), 'all');  
G = mean(squeeze(double(ROI_RGB(:,:,2))), 'all');  
B = mean(squeeze(double(ROI_RGB(:,:,3))), 'all');
```

```
% STD
```

```
Rc = squeeze(double(ROI_RGB(:,:,1)));  
Gc = squeeze(double(ROI_RGB(:,:,2)));  
Bc = squeeze(double(ROI_RGB(:,:,3)));
```

```
Rstd = std(double(Rc(:)));  
Gstd = std(double(Gc(:)));  
Bstd = std(double(Bc(:)));
```

```
RGB = [R G B];  
RGBstd = [Rstd Gstd Bstd];
```

```
% RGB values normalized to 0-1 by division with 255 (rgb2lab function needs value range from 0 - 1 -> see function documentation)
```

```
LAB=rgb2lab(RGB./255, 'WhitePoint', 'd50', 'ColorSpace', 'srgb');
```

```
% Calculation of ITA as in:
```

```
% S. Del Bino und F. Bernerd, "Variations in skin colour and the biological consequences of ultraviolet radiation exposure", Br J Dermatol, Bd. 169, S. 33-40, Okt. 2013, doi: 10.1111/bjd.12529.
```

```
ITA = atan((LAB(1)-50)/LAB(3))*180/pi;
```
